# Supplementary material
Source: Springer Nature journal article supplement (https://www.springermedizin.de/resource/supplementary/12958_2008_458_MOESM2_ESM.pdf/9567942)

Gc-5spg control

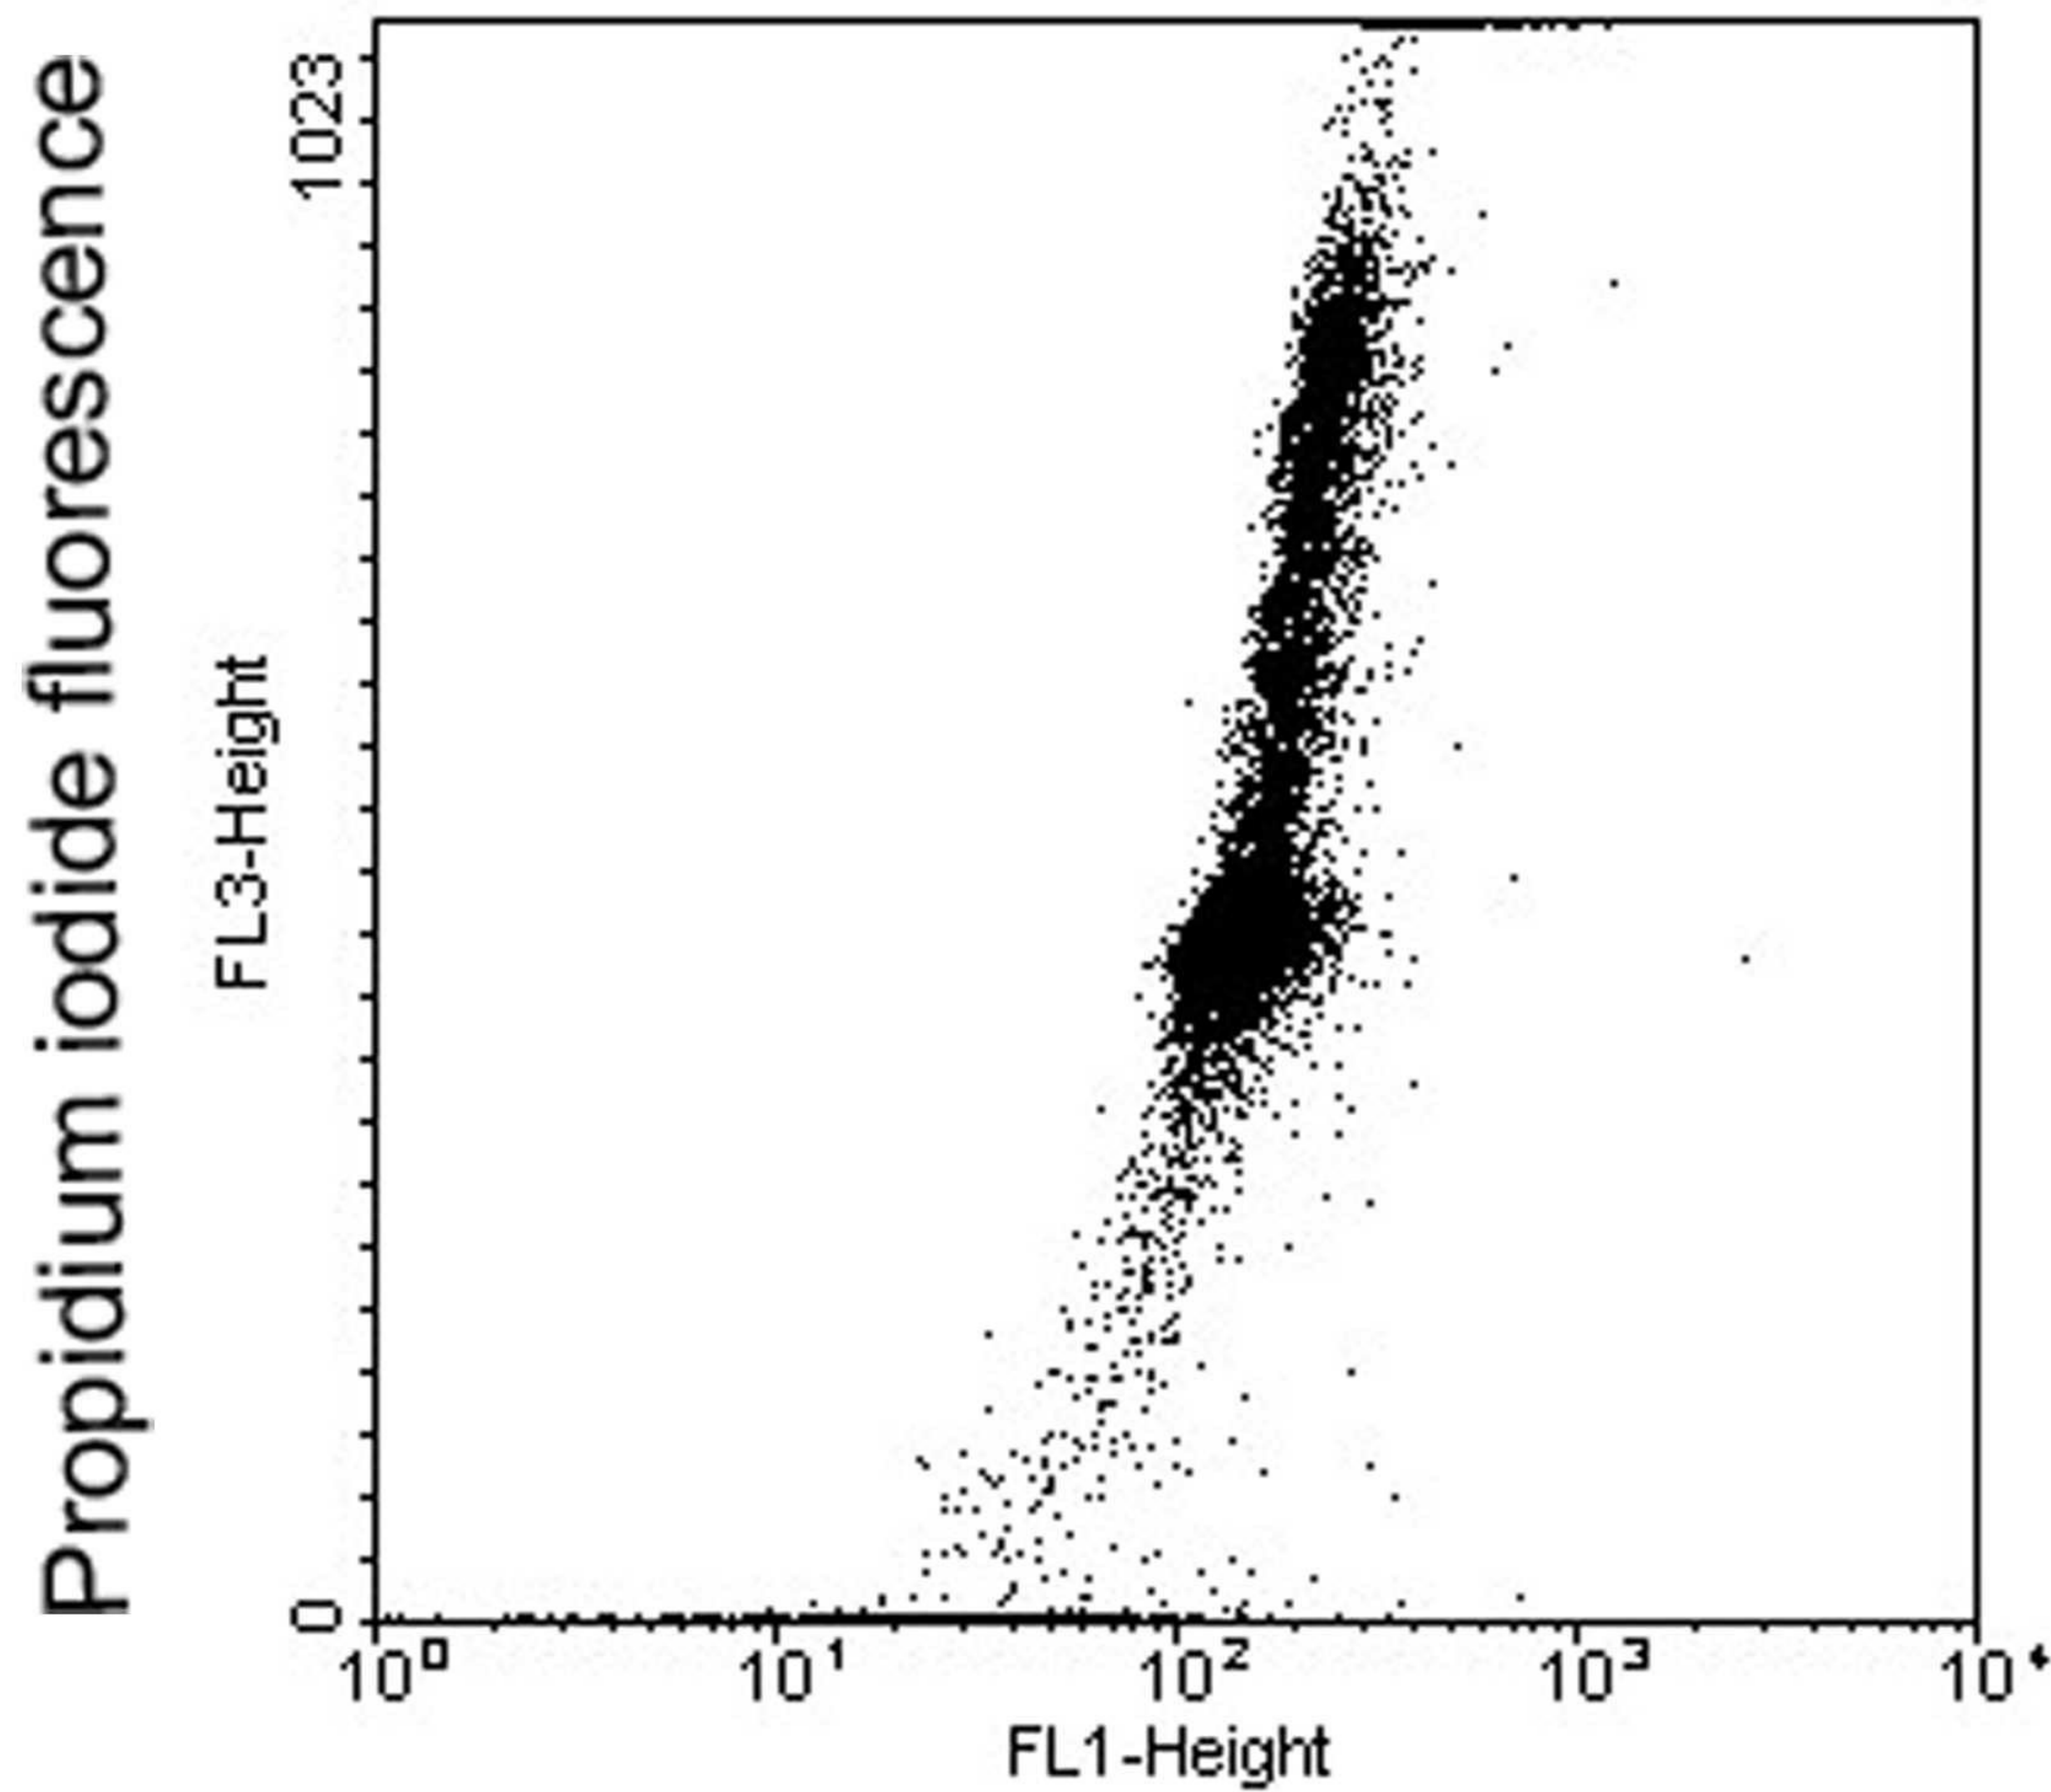

Gc-5spg CAP 200  $\mu$ M, 48 hour

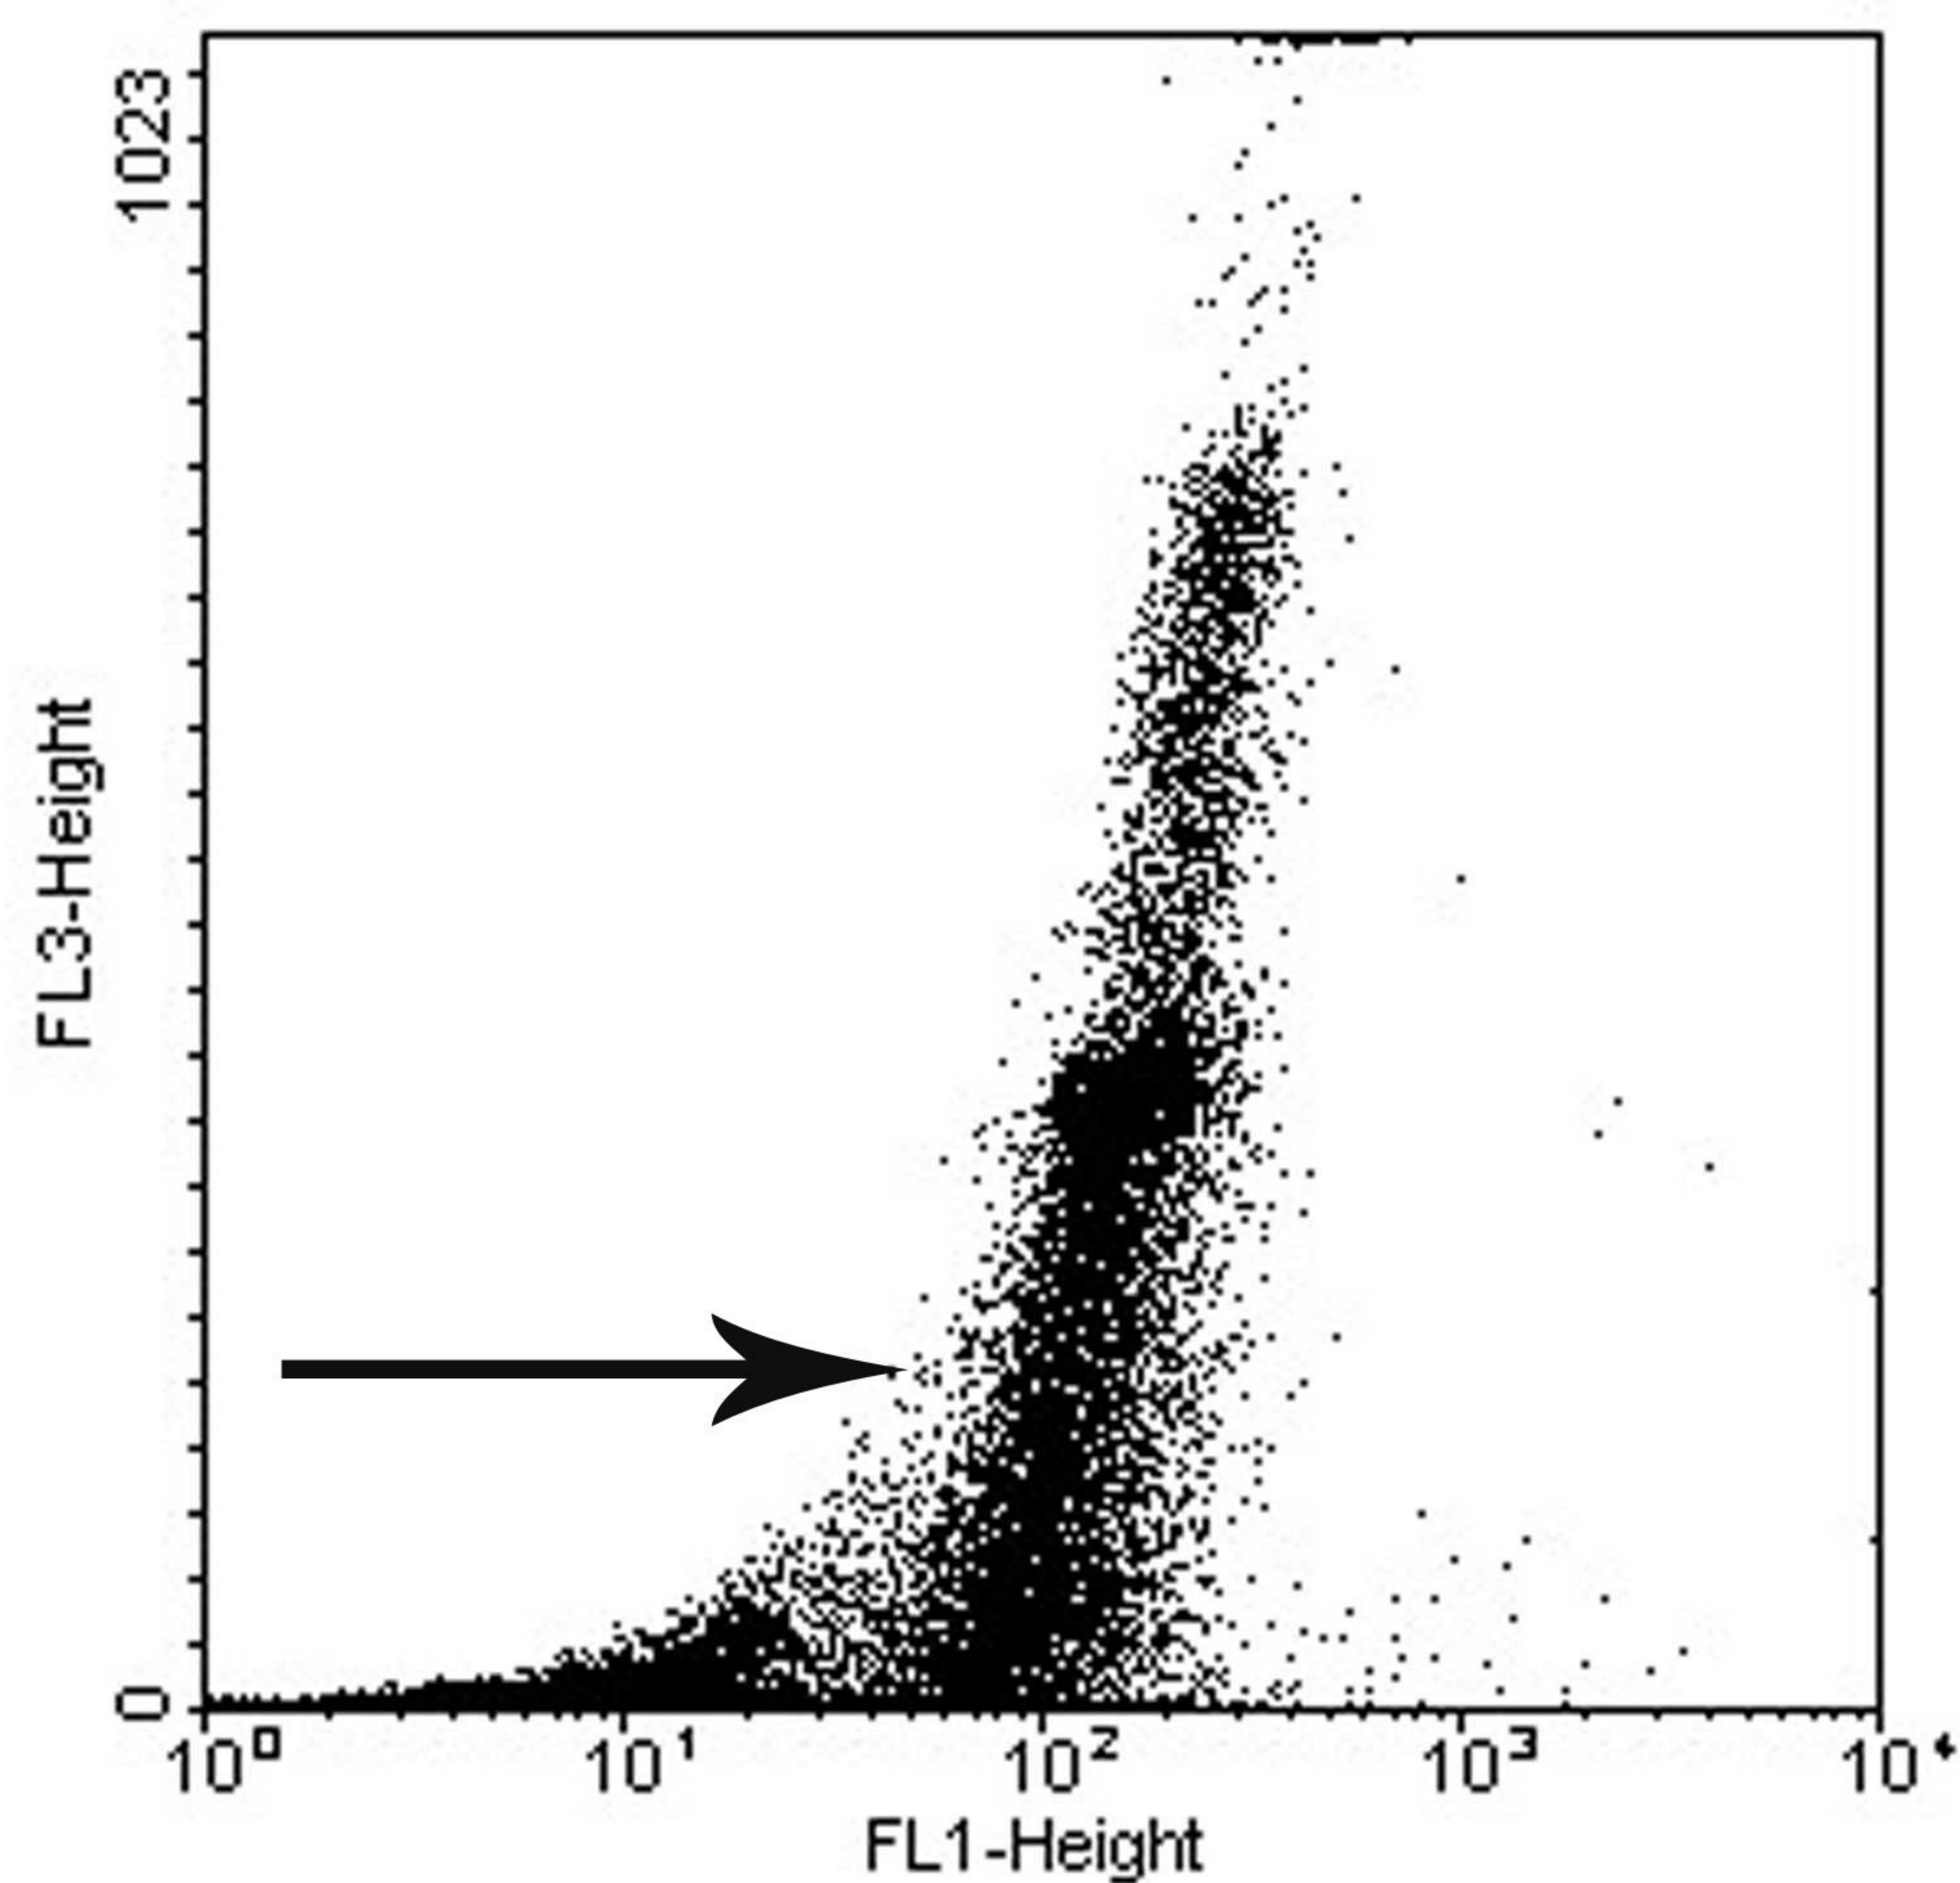

Autofluorescence (AU)

Supplement: MOESM2 [file 9567942]
